# Supplementary material for: Left-right olfactory asymmetry results from antagonistic functions of voltage-activated calcium channels and the Raw repeat protein OLRN-1 in C. elegans
Source: PubMed Central journal article supplement (PMC2213652; doi:10.1186/1749-8104-2-24), 2007-11-06

Supplementary Figure 1

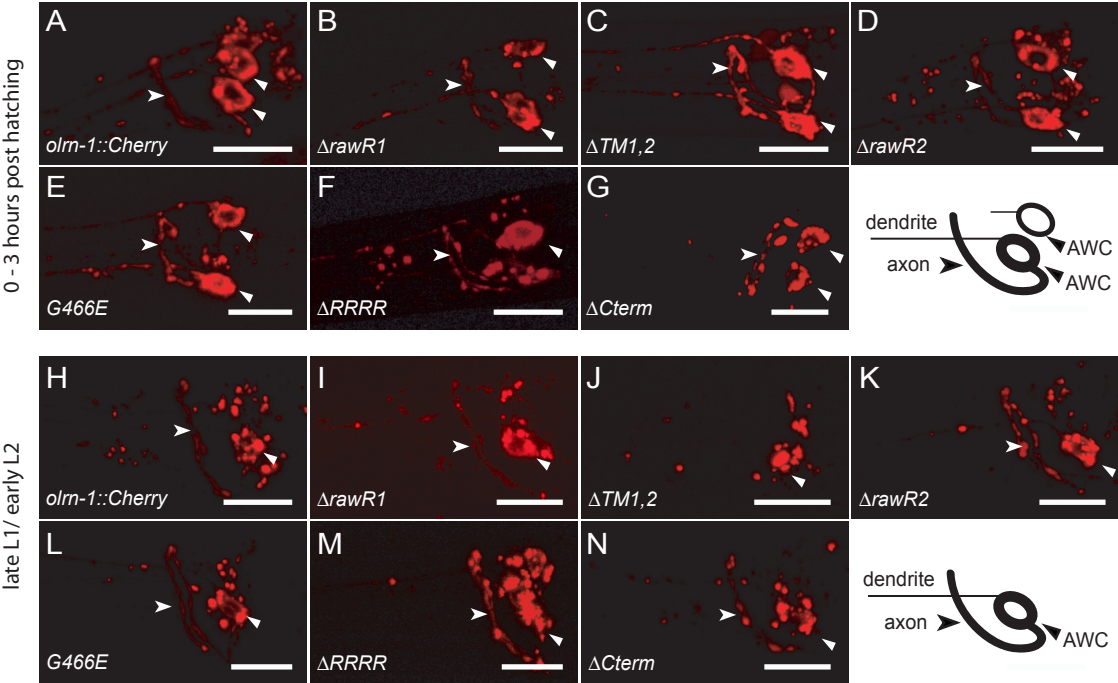

Supplement: 1749-8104-2-24-S1.pdf [file 1749-8104-2-24-S1.pdf]
